# Supplementary material for: Kidney Measurement and Glomerular Filtration Rate Evolution in Children with Polycystic Kidney Disease
Source: MDPI journal article supplement (doi:10.3390/children11050575), 2024-05-10
Supplement: s1 [file s1]

**Supplemental table S1.** Glomerular filtration rates in all children from the initial evaluation until the 1-year follow-up.

| Age  | Brion eGFR  | Schwartz eGFR | Quadratic eGFR | Follow-up Schwartz eGFR | Follow-up Quadratic eGFR | PKD mutation |
|------|-------------|---------------|----------------|-------------------------|--------------------------|--------------|
| 0.08 | 46.20314279 | -             | -              | 152.8060841             | 121.6342567              | PKD1         |
| 0.5  | 69.09018036 | -             | -              | 136.0218171             | 117.5222531              | PKD1         |
| 2    | -           | 143.782977    | 120.4903275    | 178.2517226             | 123.5248596              | -            |
| 3    | -           | 162.8206727   | 124.1637745    | N/A                     | N/A                      | PKD2         |
| 5    | -           | 136.3488321   | 115.4855086    | 149.5052984             | 119.5878744              | -            |
| 7    | -           | 160.2625648   | 125.8456194    | 160.9295409             | 121.760026               | PKD1         |
| 8    | -           | 135.8253194   | 116.7218252    | 113.8954732             | 106.8699015              | PKD1         |
| 9    | -           | 133.8804325   | 120.6295089    | 153.6194308             | 125.9122352              | PKD1         |
| 9    | -           | 105.1544704   | 106.0002908    | N/A                     | N/A                      | PKD1         |
| 12   | -           | 195.5394414   | 125.536702     | N/A                     | N/A                      | PKD2         |
| 12   | -           | 115.2070761   | 109.3185317    | 114.1974314             | 108.8859442              | PKD2         |
| 15   | -           | 100.4387047   | 105.6900692    | N/A                     | N/A                      | -            |
| 15   | -           | 76.92247672   | 86.49234885    | N/A                     | N/A                      | PKD2         |
| 16   | -           | 79.12699184   | 89.00341578    | N/A                     | N/A                      | PKD2         |
| 16   | -           | 115.3778217   | 115.4869372    | N/A                     | N/A                      | PKD2         |
| 16   | -           | 107.2655515   | 106.5189492    | N/A                     | N/A                      | -            |

Legend: Age in years; eGFR=estimated glomerular filtration measured in ml/min/1.73m<sup>2</sup>; N/A=not assigned.
